# Supplementary material for: Sialic acid-targeting multi-functionalized silicon quantum dots for synergistic photodynamic and photothermal cancer therapy
Source: Royal Society of Chemistry journal article supplement (doi:10.1039/d3bm00339f), 2023-01-01
Supplement: d3bm00339f1.pdf [file d3bm00339f1.pdf]

## **Sialic acid-targeting multifunctionalized silicon quantum dots for synergistic photodynamic and photothermal cancer therapy**

Fei Liu<sup>1†</sup>, Jiayi Lin<sup>1†</sup>, Yao Luo<sup>1†</sup>, Donglin Xie<sup>1</sup>, Jiang Bian<sup>1</sup>, Xiaobo Liu<sup>1</sup>, Jun Yue<sup>1\*</sup>

*<sup>1</sup>School of Biomedical Engineering, Shenzhen Campus of Sun Yat-sen University, Shenzhen, Guangdong 518107, P. R. China.*

*\*Corresponding to: yuejun3@mail.sysu.edu.cn*

*†These authors contributed equally to this work.*

### Contents

|                                                                                   |   |
|-----------------------------------------------------------------------------------|---|
| Table S1. Zeta potential and loading efficiency of Ce6.....                       | 2 |
| Figure S1. Fluorescence of SiQDs before and after surface functionalization ..... | 2 |
| Figure S2. Photothermal evaluations of SiQDs@PDA.....                             | 2 |
| Figure S3. Photothermal conversion efficiency .....                               | 3 |
| Figure S4. Confocal fluorescence images of SiQDs@PDA/PBA-treated cells.....       | 4 |
| Figure S5. The temperature changes of tumor sites .....                           | 4 |

Table S1. Zeta potential and loading efficiency of Ce6

| Sample        | Zeta potential (mV) <sup>a</sup> | Ce6 % <sup>b</sup> |
|---------------|----------------------------------|--------------------|
| SiQDs@PDA     | -23.23                           | N.A.               |
| SiQDs@Ce6     | -25.67                           | 7.9                |
| SiQDs@Ce6/PBA | -25.94                           | 7.9                |

<sup>a</sup> Determined by the Marvin Zeta potential analyzer; <sup>b</sup> Weight percentage of Ce6 in nanoparticles calculated from the calibration curve  $Y = 0.006388x + 0.05082$ ,  $R^2=0.9992$ ; N.A. means not applicable.

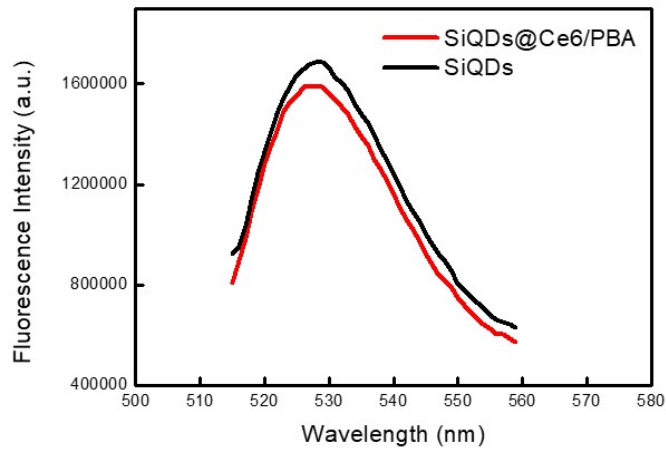

Figure S1. Fluorescence of SiQDs before and after surface functionalization with Ce6 and PBA

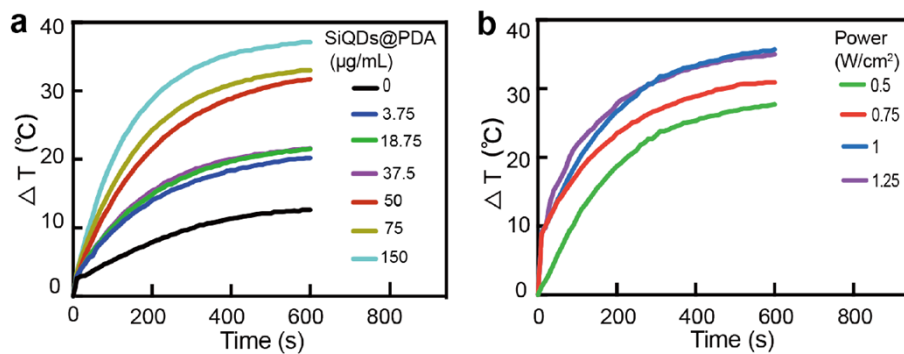

Figure S2. Photothermal evaluations of SiQDs@PDA. (a) Temperature increments ( $\Delta T$ ) of SiQDs@PDA as a function of illumination time under different nanoparticle concentrations; (b)  $\Delta T$  changes of SiQDs@PDA with time under different power intensity of 808 nm laser

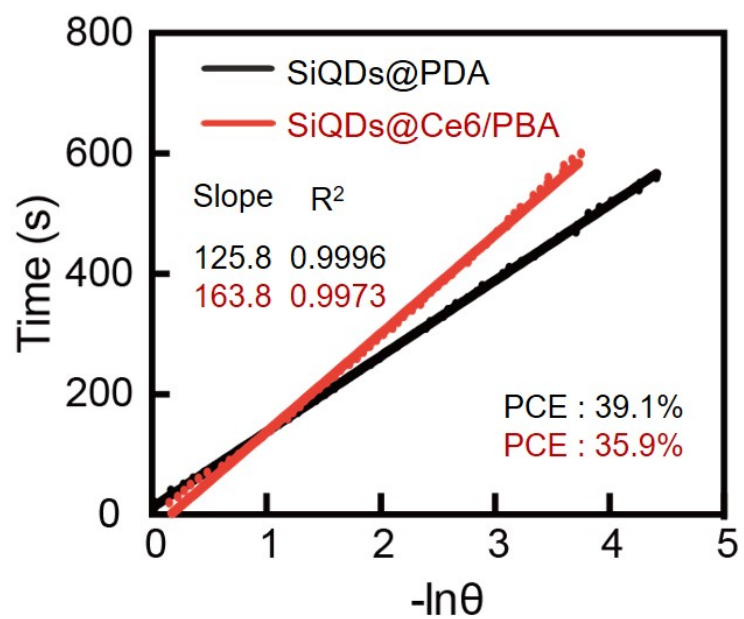

Figure S3. Photothermal conversion efficiency of SiQDs@PDA and SiQDs@PDA/PBA

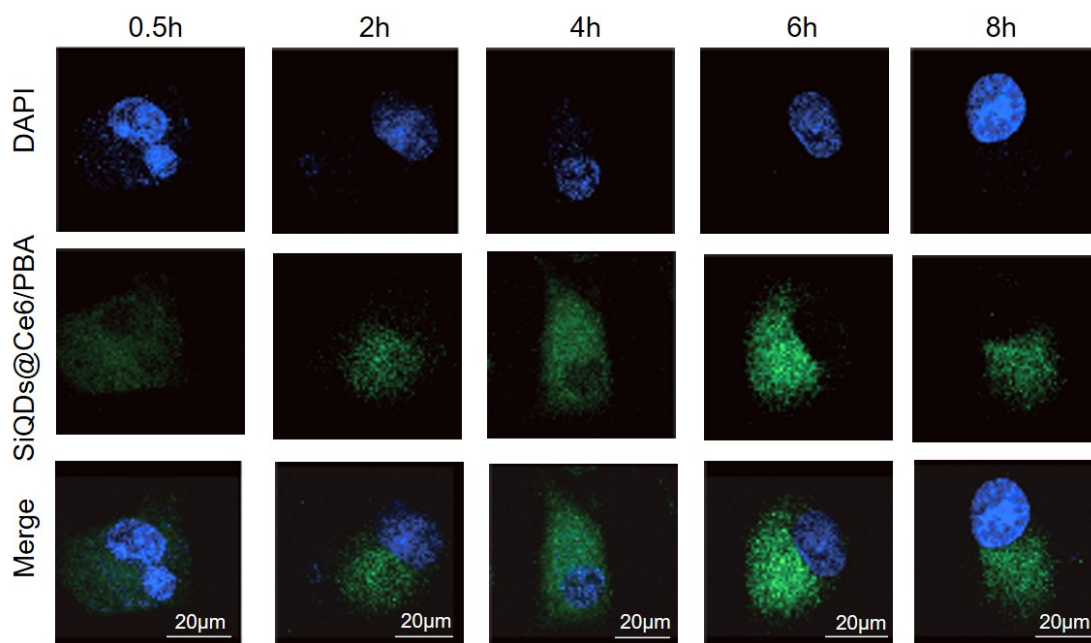

Figure S4. Confocal fluorescence images of SiQDs@PDA/PBA-treated cells at different time intervals.

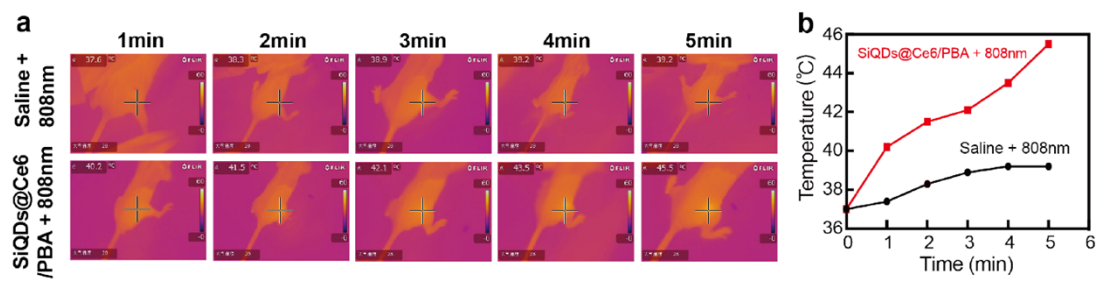

Figure S5. The temperature changes of tumor sites at different time points post-i.v.-injection with saline or SiQDs@PDA/PBA
